# Supplementary material
Source: Springer Nature journal article supplement (https://www.springermedizin.de/resource/supplementary/13054_2012_702_MOESM5_ESM.pdf/9709070)

# group3 versus group4

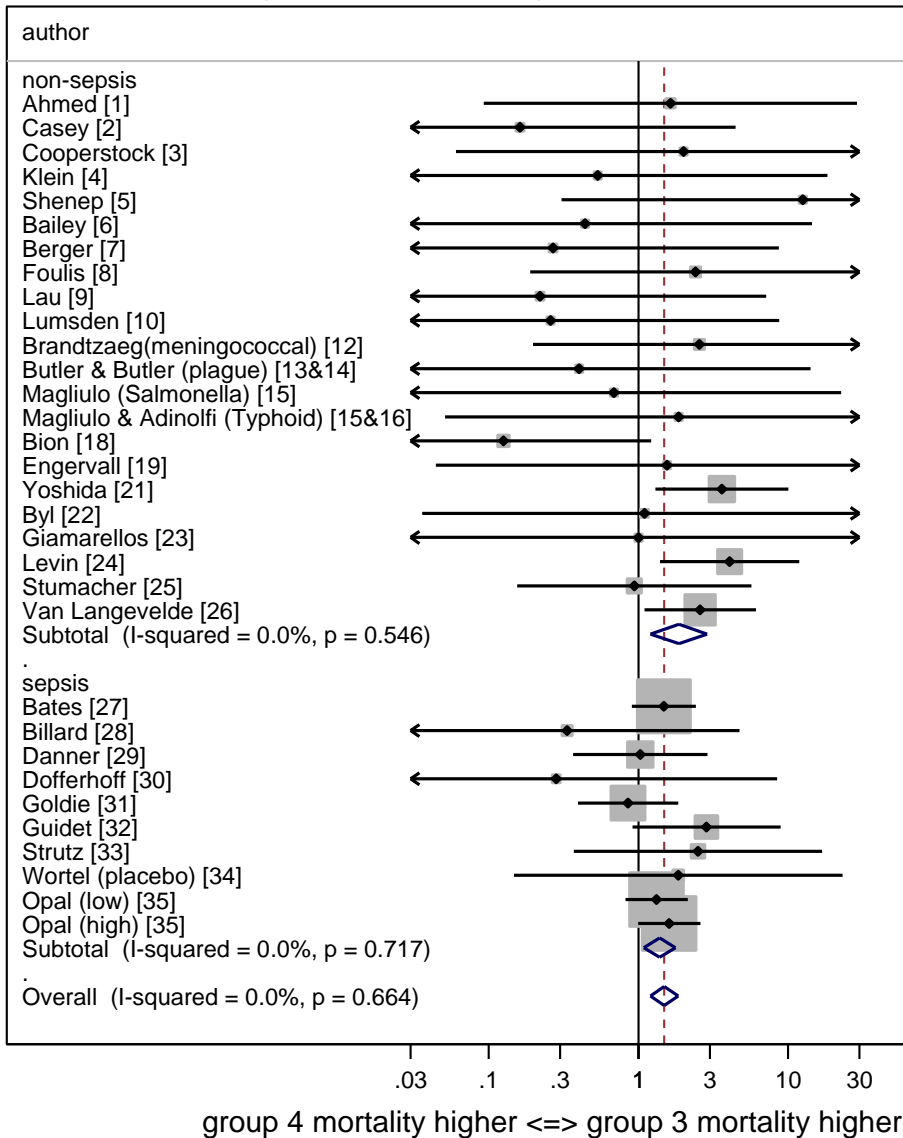

Supplement: MOESM5 [file 9709070]
